# Supplementary material
Source: ML conference proceedings conference paper supplement (https://proceedings.neurips.cc/paper_files/paper/2021/hash/adf8d7f8c53c8688e63a02bfb3055497-Abstract.html)
Supplement: Supplementary file 1 [file adf8d7f8c53c8688e63a02bfb3055497-Supplemental.pdf]

# Supplementary Material: Appendices

## A Derivation of Variational System

Let us consider a perturbed initial condition  $\bar{x}_0 = x_0 + \bar{\delta}_0$ , from which the solution  $\bar{x}(t)$  arises. Suppose that the solution  $\bar{x}(t)$  satisfies  $\bar{x}(t) = x(t) + \bar{\delta}(t)$ . Then,

$$\begin{aligned} \frac{d}{dt} \bar{\delta} &= \frac{d}{dt} (\bar{x} - x) \\ &= f(\bar{x}, t) - f(x, t) \\ &= \frac{\partial f}{\partial x}(x, t) (\bar{x} - x) + o(|\bar{x} - x|) \\ &= \frac{\partial f}{\partial x}(x, t) \bar{\delta} + o(|\bar{\delta}|), \\ \bar{\delta}(0) &= \bar{\delta}_0. \end{aligned} \tag{9}$$

Dividing  $\bar{\delta}$  by  $\bar{\delta}_0$  and taking the limit as  $|\bar{\delta}_0| \rightarrow +0$ , we define the variational variable as  $\delta(t) = \frac{\partial x(t)}{\partial x_0}$  and the *variational system* as

$$\frac{d}{dt} \delta(t) = \frac{\partial f}{\partial x}(x(t), t) \delta(t) \text{ for } \delta(0) = I. \tag{10}$$

## B Complete Proofs

**Proof of Remark 1:**

$$\frac{d}{dt} (\lambda^\top \delta) = \left( \frac{d}{dt} \lambda \right)^\top \delta + \lambda^\top \left( \frac{d}{dt} \delta \right) = \left( -\frac{\partial f}{\partial x}(x, t)^\top \lambda \right)^\top \delta + \lambda^\top \left( \frac{\partial f}{\partial x}(x, t) \delta \right) = 0. \tag{11}$$

**Proof of Remark 2:** Because  $\delta(t) = \frac{\partial x(t)}{\partial x_0}$  and  $\lambda^\top \delta$  is time-invariant,

$$\frac{\partial \mathcal{L}(x(T))}{\partial x_0} = \frac{\partial \mathcal{L}(x(T))}{\partial x(T)} \frac{\partial x(T)}{\partial x_0} = \lambda(T)^\top \delta(T) = \lambda(t)^\top \delta(t) = \frac{\partial \mathcal{L}(x(T))}{\partial x(t)} \frac{\partial x(t)}{\partial x_0}. \tag{12}$$

**Proof of Remark 3:** Differentiating each term in the Runge–Kutta method in Eq. (5) by the initial condition  $x_0$  gives the Runge–Kutta method applied to the variational variable  $\delta$ , as follows.

$$\begin{aligned} \delta_{n+1} &= \delta_n + h_n \sum_{i=1}^s b_i d_{n,i}, \\ d_{n,i} &:= \frac{\partial k_{n,i}}{\partial x_0} = \frac{\partial f(X_{n,i}, t_n + c_i h_n)}{\partial x_0} = \frac{\partial f(X_{n,i}, t_n + c_i h_n)}{\partial X_{n,i}} \Delta_{n,i}, \\ \Delta_{n,i} &:= \frac{\partial X_{n,i}}{\partial x_0} = \delta_n + h_n \sum_{j=1}^s a_{i,j} d_{n,j}. \end{aligned} \tag{13}$$

**Proof of Theorem 1:** Because the quantity  $S$  is conserved in continuous time,

$$\frac{d}{dt} S(\delta, \lambda) = 0. \tag{14}$$

Because the quantity  $S$  is bilinear,

$$\frac{d}{dt} S(\delta, \lambda) = \frac{\partial S}{\partial \delta} \frac{d\delta}{dt} + \frac{\partial S}{\partial \lambda} \frac{d\lambda}{dt} = S \left( \frac{d\delta}{dt}, \lambda \right) + S \left( \delta, \frac{d\lambda}{dt} \right), \tag{15}$$

which implies

$$S(d_{n,i}, \Lambda_{n,i}) + S(\Delta_{n,i}, l_{n,i}) = 0. \tag{16}$$

The change in the bilinear quantity  $S(\delta, \lambda)$  is

$$\begin{aligned}
S(\delta_{n+1}, \lambda_{n+1}) - S(\delta_n, \lambda_n) &= S(\delta_n + h_n \sum_i b_i d_{n,i}, \lambda_n + h_n \sum_i B_i l_{n,i}) - S(\delta_n, \lambda_n) \\
&= \sum_i b_i h_n S(d_{n,i}, \lambda_n) + \sum_i B_i h_n S(\delta_n, l_{n,i}) \\
&\quad + \sum_i \sum_j b_i B_j h_n^2 S(d_{n,i}, l_{n,j}) \\
&= \sum_i b_i h_n S(d_{n,i}, \Lambda_{n,i} - h_n \sum_j A_{i,j} l_{n,j}) \\
&\quad + \sum_i B_i h_n S(\Delta_{n,i} - h_n \sum_j a_{i,j} d_{n,j}, l_{n,i}) \\
&\quad + \sum_i \sum_j b_i B_j h_n^2 S(d_{n,i}, l_{n,j}) \\
&= \sum_i h_n (b_i S(d_{n,i}, \Lambda_{n,i}) + B_i S(\Delta_{n,i}, l_{n,i})) \\
&\quad + \sum_i \sum_j (-b_i A_{i,j} - B_j a_{j,i} + b_i B_j) h_n^2 S(d_{n,i}, l_{n,j}).
\end{aligned} \tag{17}$$

If  $B_i = b_i$  and  $b_i A_{i,j} + B_j a_{j,i} - b_i B_j = 0$ , the change vanishes, i.e., the partitioned Runge–Kutta conserves a bilinear quantity  $S$ . Note that  $b_i$  must not vanish because  $A_{i,j} = B_j(1 - a_{j,i}/b_i)$ . Therefore, the bilinear quantity  $\lambda_n^\top \delta_n$  is conserved as

$$\lambda_N^\top \delta_N = \lambda_n^\top \delta_n \text{ for } n = 0, \dots, N. \tag{18}$$

Remark 3 indicates  $\delta_n = \frac{\partial x_n}{\partial x_0}$ . When  $\lambda_N$  is set to  $(\frac{\partial \mathcal{L}(x_N)}{\partial x_N})^\top$ ,

$$\frac{\partial \mathcal{L}(x_N)}{\partial x_0} = \frac{\partial \mathcal{L}(x_N)}{\partial x_N} \frac{\partial x_N}{\partial x_0} = \lambda_N^\top \delta_N = \lambda_n^\top \delta_n = \frac{\partial \mathcal{L}(x_N)}{\partial x_n} \frac{\partial x_n}{\partial x_0}, \tag{19}$$

Therefore,  $\lambda_n = (\frac{\partial \mathcal{L}(x_N)}{\partial x_n})^\top$ .

**Proof of Theorem 2:** By solving the combination of the integrators in Eqs. (5) and (7), a change in a bilinear quantity  $S(\delta, \lambda)$  that the continuous-time dynamics conserves is

$$\begin{aligned}
S(\delta_{n+1}, \lambda_{n+1}) - S(\delta_n, \lambda_n) &= S(\delta_n + h_n \sum_i b_i d_{n,i}, \lambda_n + h_n \sum_i \tilde{b}_i l_{n,i}) - S(\delta_n, \lambda_n) \\
&= \sum_i b_i h_n S(d_{n,i}, \lambda_n) + \sum_i \tilde{b}_i h_n S(\delta_n, l_{n,i}) \\
&\quad + \sum_i \sum_j b_i \tilde{b}_j h_n^2 S(d_{n,i}, l_{n,j}) \\
&= \sum_{i \notin I_0} b_i h_n S(d_{n,i}, \Lambda_{n,i} - h_n \sum_j \tilde{b}_j (1 - a_{j,i}/b_i) l_{n,j}) \\
&\quad + \sum_i \tilde{b}_i h_n S(\Delta_{n,i} - h_n \sum_j a_{i,j} d_{n,j}, l_{n,i}) \\
&\quad + \sum_{i \notin I_0} \sum_j b_i \tilde{b}_j h_n^2 S(d_{n,i}, l_{n,j}) \\
&= \sum_{i \notin I_0} b_i h_n (S(d_{n,i}, \Lambda_{n,j}) + S(\Delta_{n,i}, l_{n,j})) \\
&\quad + \sum_{i \notin I_0} \sum_j (-b_i \tilde{b}_j (1 - a_{j,i}/b_i) - \tilde{b}_j a_{j,i} + b_i \tilde{b}_j) h_n^2 S(d_{n,i}, l_{n,j}) \\
&\quad + \sum_{i \in I_0} (\tilde{b}_i h_n S(\Delta_{n,i}, l_{n,j}) - \sum_j \tilde{b}_j a_{j,i} h_n^2 S(d_{n,i}, l_{n,j})) \\
&= \sum_{i \notin I_0} b_i h_n (S(d_{n,i}, \Lambda_{n,j}) + S(\Delta_{n,i}, l_{n,j})) \\
&\quad + \sum_{i \in I_0} h_n^2 (S(d_{n,i}, \Lambda_{n,j}) + S(\Delta_{n,i}, l_{n,j})) \\
&= 0.
\end{aligned} \tag{20}$$

Hence, the bilinear quantity  $S(\delta, \lambda)$  is conserved.

**Proof of Remark 4:** Eq. (6) can be rewritten as

$$\begin{aligned}
\lambda_n &= \lambda_{n+1} - h_n \sum_{i=1}^s b_i l_{n,i} \\
l_{n,i} &= -\frac{\partial f}{\partial x}(X_{n,i}, t_n + c_i h_n)^\top \Lambda_{n,i}, \\
\Lambda_{n,i} &= \lambda_{n+1} - h_n \sum_{i=1}^s b_j \frac{a_{j,i}}{b_i} l_{n,j}.
\end{aligned} \tag{21}$$

Eq. (7) can be rewritten as

$$\begin{aligned}
\lambda_n &= \lambda_{n+1} - h_n \sum_{i=1}^s \tilde{b}_i l_{n,i}, \\
l_{n,i} &= -\frac{\partial f}{\partial x}(X_{n,i}, t_n + c_i h_n)^\top \Lambda_{n,i}, \\
\Lambda_{n,i} &= \begin{cases} \lambda_{n+1} - h_n \sum_{j=1}^s \tilde{b}_j \frac{a_{j,i}}{b_i} l_{n,j} & \text{if } i \notin I_0 \\ -\sum_{j=1}^s \tilde{b}_j a_{j,i} l_{n,j} & \text{if } i \in I_0. \end{cases}
\end{aligned} \tag{22}$$

Because  $a_{i,j} = 0$  for  $j \geq i$ ,  $a_{j,i} = 0$  for  $j \leq i$ . The intermediate adjoint variable  $\Lambda_{n,i}$  is calculable from  $i = s$  to  $i = 1$  sequentially, i.e., the integration backward in time is explicit.

## C Gradients in General Cases

### C.1 Gradient w.r.t. Parameters

For the parameter adjustment, one can consider the parameters  $\theta$  as a part of the augmented state  $\tilde{x} = [x \ \theta]^\top$  of the system

$$\frac{d}{dt} \tilde{x} = \tilde{f}(\tilde{x}, t), \quad \tilde{f}(\tilde{x}, t) = \begin{bmatrix} f(x, t, \theta) \\ 0 \end{bmatrix}, \quad \tilde{x}(0) = \begin{bmatrix} x_0 \\ \theta \end{bmatrix}. \tag{23}$$

The variational and adjoint variables are augmented in the same way. For the augmented adjoint variable  $\tilde{\lambda} = [\lambda \ \lambda_\theta]^\top$ , the augmented adjoint system is

$$\frac{d}{dt} \tilde{\lambda} = -\frac{\partial \tilde{f}}{\partial \tilde{x}}(\tilde{x}, t)^\top \tilde{\lambda} = -\begin{bmatrix} \frac{\partial f}{\partial x}^\top & 0 \\ \frac{\partial f}{\partial \theta}^\top & 0 \end{bmatrix} \begin{bmatrix} \lambda \\ \lambda_\theta \end{bmatrix} = \begin{bmatrix} -\frac{\partial f}{\partial x}^\top \lambda \\ -\frac{\partial f}{\partial \theta}^\top \lambda \end{bmatrix}. \tag{24}$$

Hence, the adjoint variable  $\lambda$  for the system state  $x$  is unchanged from Eq. (3), and the one  $\lambda_\theta$  for the parameters  $\theta$  depends on the former as

$$\frac{d}{dt} \lambda_\theta = -\frac{\partial f}{\partial \theta}(x, t, \theta)^\top \lambda, \tag{25}$$

and  $\lambda_\theta(T) = \left(\frac{\partial \mathcal{L}(x(T), \theta)}{\partial \theta}\right)^\top$ .

### C.2 Gradient of Functional

When the solution  $x(t)$  is evaluated by a functional  $\mathcal{C}$  as

$$\mathcal{C}(x(t)) = \int_0^T \mathcal{L}(x(t), t) dt, \tag{26}$$

the adjoint variable  $\lambda_C$  that denotes the gradient  $\lambda_C(t) = \left(\frac{\partial \mathcal{C}(x(T))}{\partial x(t)}\right)^\top$  of the functional  $\mathcal{C}$  is given by

$$\frac{d}{dt} \lambda_C = -\frac{\partial f}{\partial x}(x, t)^\top \lambda_C + \frac{\partial \mathcal{L}(x(t), t)}{\partial x(t)}, \quad \lambda_C(T) = \mathbf{0}. \tag{27}$$

## D Implementation Details

### D.1 Robustness to Rounding Error

By definition, the naive backpropagation algorithm, baseline scheme, ACA, and the proposed symplectic adjoint method provide the exact gradient up to rounding error. However, the naive backpropagation algorithm and baseline scheme obtained slightly worse results on the GAS, POWER, and HEPMASS datasets. Due to the repeated use of the neural network, each method accumulates the gradient of the parameters  $\theta$  for each use. Let  $\theta_{n,i}$  denote the parameters used in the  $i$ -th stage of  $n$ -th

Table A1: Results on learning physical systems without the deterministic option.

|                     | KdV Equation             |                        |              | Cahn–Hilliard System     |                        |              |
|---------------------|--------------------------|------------------------|--------------|--------------------------|------------------------|--------------|
|                     | MSE ( $\times 10^{-3}$ ) | mem.                   | time         | MSE ( $\times 10^{-6}$ ) | mem.                   | time         |
| adjoint method [2]  | 1.61 $\pm$ 3.23          | <b>181.4</b> $\pm$ 0.0 | 240 $\pm$ 16 | 5.58 $\pm$ 2.12          | <b>181.4</b> $\pm$ 0.0 | 805 $\pm$ 25 |
| backpropagation [2] | 1.61 $\pm$ 3.24          | 733.9 $\pm$ 15.6       | 94 $\pm$ 4   | 5.45 $\pm$ 1.55          | 3053.5 $\pm$ 22.9      | 382 $\pm$ 11 |
| ACA [46]            | 1.61 $\pm$ 3.24          | 734.5 $\pm$ 20.3       | 120 $\pm$ 4  | 6.00 $\pm$ 3.27          | 780.4 $\pm$ 22.9       | 422 $\pm$ 16 |
| proposed            | 1.61 $\pm$ 3.58          | 182.1 $\pm$ 0.0        | 141 $\pm$ 7  | 5.48 $\pm$ 1.90          | 182.1 $\pm$ 0.0        | 480 $\pm$ 19 |

Mean-squared errors (MSEs) in long-term predictions, peak memory consumption [MiB], and computation time per iteration [ms/itr].

step even though their values are unchanged. The backpropagation algorithm obtains the gradient  $\frac{\partial \mathcal{L}}{\partial \theta}$  with respect to the parameters  $\theta$  by accumulating the gradient over all stages and steps one-by-one as

$$\frac{\partial \mathcal{L}}{\partial \theta} = \sum_{\substack{n=0, \dots, N-1, \\ i=1, \dots, s}} \frac{\partial \mathcal{L}}{\partial \theta_{n,i}}. \quad (28)$$

When the step size  $h_n$  at the  $n$ -th step is sufficiently small, the gradient  $\frac{\partial \mathcal{L}}{\partial \theta_{n,i}}$  at the  $i$ -th stage may be insignificant compared with the accumulated gradient and be rounded off during the accumulation.

Conversely, ACA accumulates the gradient within a step and then over time steps; this process can be expressed informally as

$$\frac{\partial \mathcal{L}}{\partial \theta} = \sum_{n=0}^{N-1} \left( \sum_{i=1}^s \frac{\partial \mathcal{L}}{\partial \theta_{n,i}} \right). \quad (29)$$

Further, according to Eqs. (6) and (25), the (symplectic) adjoint method accumulates the adjoint variable  $\lambda$  (i.e., the transpose of the gradient) within a step and then over time steps as

$$\lambda_{\theta,n} = \lambda_{\theta,n+1} - h_n \left( \sum_{i=1}^s B_i \left( -\frac{\partial f}{\partial \theta_{n,i}} (X_{n,i}, t + C_i h_n, \theta_{n,i})^\top \Lambda_{n,i} \right) \right). \quad (30)$$

In these cases, even when the step size  $h_n$  at the  $n$ -th step is small, the gradient summed within a step (over  $s$  stages) may still be significant and robust to rounding errors. This is the reason the adjoint method, ACA, and the symplectic adjoint method performed better than the naive backpropagation algorithm and baseline scheme for some datasets. Note that this approach requires additional memory consumption to store the gradient summed within a step, and it is applicable to the backpropagation algorithm with a slight modification.

## D.2 Memory Consumption Optimization

Following Eqs. (21) and (22), a naive implementation of the adjoint method retains the adjoint variables  $\Lambda_{n,i}$  at all stages  $i = 1, \dots, s$  to obtain their time-derivatives  $l_{n,i}$ , and then adds them up to obtain the adjoint variable  $\lambda_n$  at the  $n$ -th time step. However, as Eq. (25) shows, the adjoint variable  $\lambda_\theta$  for the parameters  $\theta$  is not used for obtaining its time-derivative  $\frac{d}{dt} \lambda_\theta$ . One can add up the adjoint variable  $\Lambda_{\theta,n,i}$  for the parameters  $\theta$  at stage  $i$  one-by-one without retaining it, thereby reducing the memory consumption proportionally to the number of parameters *times* the number of stages. A similar optimization is applicable to the adjoint method.

## D.3 Parallelization

The memory consumption and computation time depend highly on the implementations and devices. Being implemented on a GPU, the convolution operation can be easily parallelized in space and exhibits a non-deterministic behavior. To avoid the non-deterministic behavior, PyTorch provides an option `TORCH.BACKENDS.CUDNN.DETERMINISTIC`, which was used to obtain the results in Section 5.2, following the original implementation [31]. Without this option, the memory consumption increased by a certain amount, and the computation times reduced due to the aggressive

parallelization, as shown by the results in Table A1. Even then, the proposed symplectic adjoint method occupied the smallest memory among the methods for the exact gradient. The increase in the memory consumption is proportional to the width of a neural network; therefore, it is negligible when the neural network is sufficiently deep.

Note that the results in Section 5.1 were obtained without the deterministic option.

Table A2: Results obtained for continuous normalizing flows.

|                     | MINIBOONE ( $M = 1$ ) |              |           | GAS ( $M = 5$ ) |              |            | POWER ( $M = 5$ ) |                 |            |
|---------------------|-----------------------|--------------|-----------|-----------------|--------------|------------|-------------------|-----------------|------------|
|                     | NLL                   | mem.         | time      | NLL             | mem.         | time       | NLL               | mem.            | time       |
| adjoint method [2]  | 10.59±0.17            | 170± 0       | 0.74±0.04 | -10.53±0.25     | 24± 0        | 4.82±0.29  | -0.31±0.01        | <b>8.1± 0.0</b> | 6.33±0.18  |
| backpropagation [2] | 10.54±0.18            | 4,436±115    | 0.91±0.05 | -9.53±0.42      | 4,479±250    | 12.00±0.93 | -0.24±0.05        | 1710.9±193.1    | 10.64±2.73 |
| baseline scheme     | 10.54±0.18            | 4,457±115    | 1.10±0.04 | -9.53±0.42      | 1,858±228    | 5.48±0.25  | -0.24±0.05        | 515.2±122.0     | 4.37±0.70  |
| ACA [46]            | 10.57±0.30            | 306± 0       | 0.77±0.02 | -10.65±0.45     | 73± 0        | 3.98±0.14  | -0.31±0.02        | 29.5± 0.5       | 5.08±0.88  |
| proposed            | 10.49±0.11            | <b>95± 0</b> | 0.84±0.03 | -10.89±0.11     | <b>20± 0</b> | 4.39±0.23  | -0.31±0.02        | 9.2± 0.0        | 5.73±0.43  |

  

|                     | HEPMASS ( $M = 10$ ) |              |            | BSDS300 ( $M = 2$ ) |              |            | MNIST ( $M = 6$ ) |                |            |
|---------------------|----------------------|--------------|------------|---------------------|--------------|------------|-------------------|----------------|------------|
|                     | NLL                  | mem.         | time       | NLL                 | mem.         | time       | NLL               | mem.           | time       |
| adjoint method [2]  | 16.49±0.25           | 40± 0        | 4.19±0.15  | -152.04±0.09        | 577±0        | 11.70±0.44 | 0.918±0.011       | 1,086±4        | 10.12±0.88 |
| backpropagation [2] | 17.03±0.22           | 5,254±137    | 11.82±1.33 | —                   | —            | —          | —                 | —              | —          |
| baseline scheme     | 17.03±0.22           | 1,102±174    | 4.40±0.40  | —                   | —            | —          | —                 | —              | —          |
| ACA [46]            | 16.41±0.39           | 88± 0        | 3.67±0.12  | -151.27±0.47        | 757±1        | 6.97±0.25  | 0.919±0.003       | 4,332±1        | 7.94±0.63  |
| proposed            | 16.48±0.20           | <b>35± 0</b> | 4.15±0.13  | -151.17±0.15        | <b>283±2</b> | 8.07±0.72  | 0.917±0.002       | <b>1,079±1</b> | 9.42±0.32  |

Negative log-likelihoods (NLL), peak memory consumption [MiB], and computation time per iteration [s/itr]. The medians  $\pm$  standard deviations of three runs.

## Checklist

1. For all authors...
  - (a) Do the main claims made in the abstract and introduction accurately reflect the paper’s contributions and scope? [Yes] The exactness of the gradient is shown theoretically by Theorems 1 and 2, which are proved in Appendix B. The memory consumption and computation time are summarized in Tables 2, 4, and A1. The robustness to rounding errors is confirmed in **Performance** paragraph in Section 5.1 and Appendix D.1.
  - (b) Did you describe the limitations of your work? [Yes] Throughout the manuscript, especially at the bottom of Section 4.2, we have mentioned that the proposed method is applicable only to Runge–Kutta methods.
  - (c) Did you discuss any potential negative societal impacts of your work? [N/A] No societal impact is supposed.
  - (d) Have you read the ethics review guidelines and ensured that your paper conforms to them? [N/A] The authors read the guidelines. No ethical impact is supposed.
2. If you are including theoretical results...
  - (a) Did you state the full set of assumptions of all theoretical results? [Yes] Throughout the manuscript, especially at the bottom of Section 4.2, we have mentioned that the proposed method is applicable only to Runge–Kutta methods.
  - (b) Did you include complete proofs of all theoretical results? [Yes] The complete proofs are provided in Appendix B.
3. If you ran experiments...
  - (a) Did you include the code, data, and instructions needed to reproduce the main experimental results (either in the supplemental material or as a URL)? [Yes] We have provided the links to the code in Section 5 and to the external resources in the footnotes on pages 7 and 10. We have provided the versions of packages at the beginning of Section 5.
  - (b) Did you specify all the training details (e.g., data splits, hyperparameters, how they were chosen)? [Yes] As mentioned in Sections 5.1 and 5.2, we adopted the training details used in the original studies, except for the batch-size and integrators.
  - (c) Did you report error bars (e.g., with respect to the random seed after running experiments multiple times)? [Yes] We have provided the standard deviations of the performance in Tables A2, 3, 4, and A1.
  - (d) Did you include the total amount of compute and the type of resources used (e.g., type of GPUs, internal cluster, or cloud provider)? [Yes] We used NVIDIA GeForce RTX 2080Ti, NVIDIA RTX A6000, and NVIDIA TITAN V, depending on the experiments, as mentioned in Sections 5.1 and 5.2.
4. If you are using existing assets (e.g., code, data, models) or curating/releasing new assets...
  - (a) If your work uses existing assets, did you cite the creators? [Yes] We cited [12] and [31], and we provided links to the codes in the footnotes on pages 7 and 10.
  - (b) Did you mention the license of the assets? [Yes] We have mentioned the license information in the footnotes on pages 7 and 10.
  - (c) Did you include any new assets either in the supplemental material or as a URL? [Yes] We have provided the link to the code in Section 5.
  - (d) Did you discuss whether and how consent was obtained from people whose data you’re using/curating? [N/A]
  - (e) Did you discuss whether the data you are using/curating contains personally identifiable information or offensive content? [N/A]
5. If you used crowdsourcing or conducted research with human subjects...
  - (a) Did you include the full text of instructions given to participants and screenshots, if applicable? [N/A]
  - (b) Did you describe any potential participant risks, with links to Institutional Review Board (IRB) approvals, if applicable? [N/A]
  - (c) Did you include the estimated hourly wage paid to participants and the total amount spent on participant compensation? [N/A]
